# Supplementary material for: Sociodemographic inequalities related to the initiation of antenatal care visits during gestation in Peruvian women: an analysis of the Demographic and Family Health Survey between 2019 and 2022
Source: Research Square preprint supplement (doi:10.21203/rs.3.rs-4415035/v1), 2024-05-30
Supplement: Supplementary file 1 [file 520df6a74b631df94c2f5f11.docx]

**APPENDICES**

**Appendix 1.** Flowchart of selection of participant in DHS between 2019-2022

**DHS 2020**

(N = 35131)

**Total DHS participants between 2019 and 2022** (N = 139675)

**Total participants between 18 and 49 years old** (N = 99547)

**Participants under 18 and
over 49 years old** (N= 40128)

**Total of female between 18 and 49 years old** (N = 56456)

**DHS 2019**

(N = 34359)

**DHS 2021**

(N = 35105)

**DHS 2022**

(N = 35080)

**Male participants** (N = 43091)

- **Women with no history of pregnancy** (N = 5639)
- **Women not applicable for individual interview** (N = 1326)
- **Women not residing where surveyed** (N = 366)
- **Women without information on antenatal care visits** (N = 17472)

**Total of participants included in the study**

(N = 31653)

**DHS:** Demographic and Family Health Survey in Peru.
